# Supplementary material for: D-ribose is elevated in T1DM patients and can be involved in the onset of encephalopathy
Source: publisher site journal article supplement (doi:10.18632/aging.102089), 2019-07-15
Supplement: Supplementary file [file aging-v11i14-102089-supplementary-material-SD1.pdf]

**SUPPLEMENTARY FIGURES**

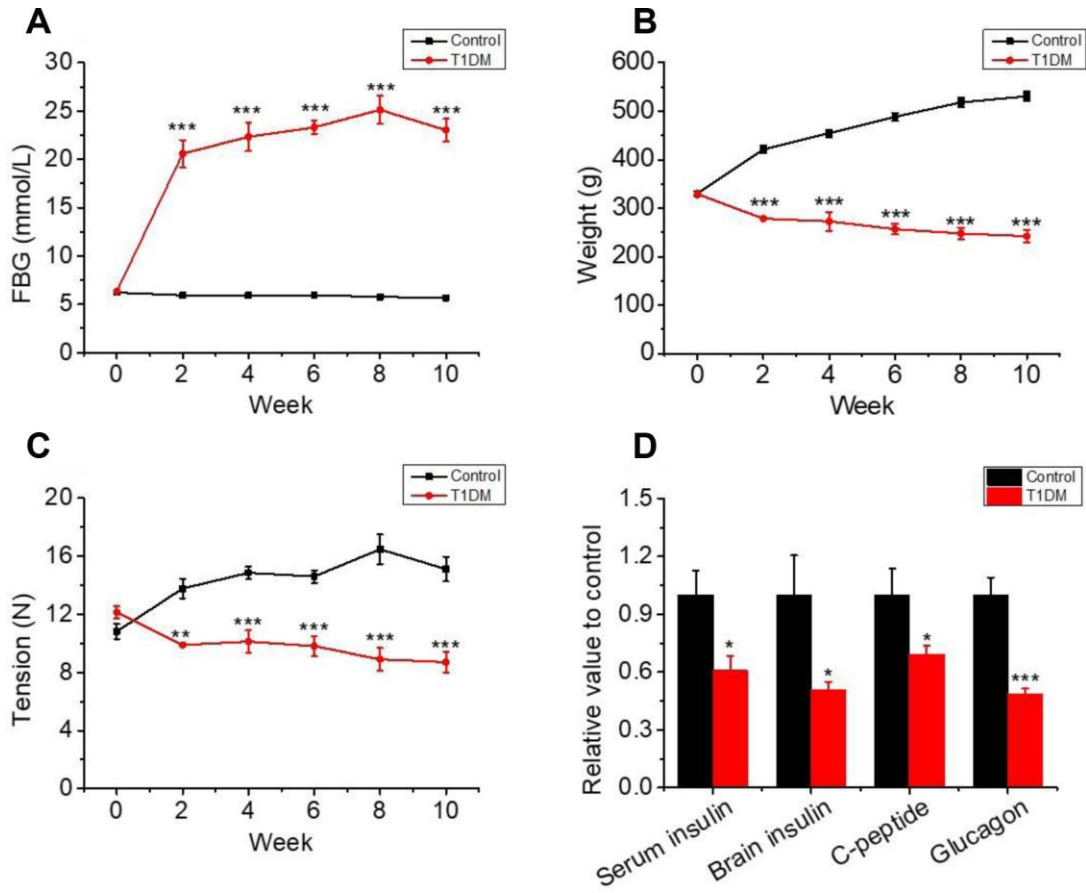

**Supplementary Figure 1. Changes in FBG, weight, tension and insulin in T1DM rats.** Male SD rats (6-8 weeks) were intraperitoneally injected with STZ (70 mg/kg bw, n=30) and maintained for 10 weeks. STZ (1%) was dissolved in citrate buffer at a pH of 4.4. Rats injected with citrate buffer were used as a control (n=10). Fasting blood glucose (FBG, panel A), body weight (panel B), and tension (panel C) of rats were monitored every other week. Rats were sacrificed after 10 weeks of acclimation, and serum insulin, brain insulin, serum C-peptide, and serum glucagon were measured (panel D). All values are expressed as the mean ± S.E.M. \*,  $P < 0.05$ ; \*\*,  $P < 0.01$ ; \*\*\*,  $P < 0.001$ .

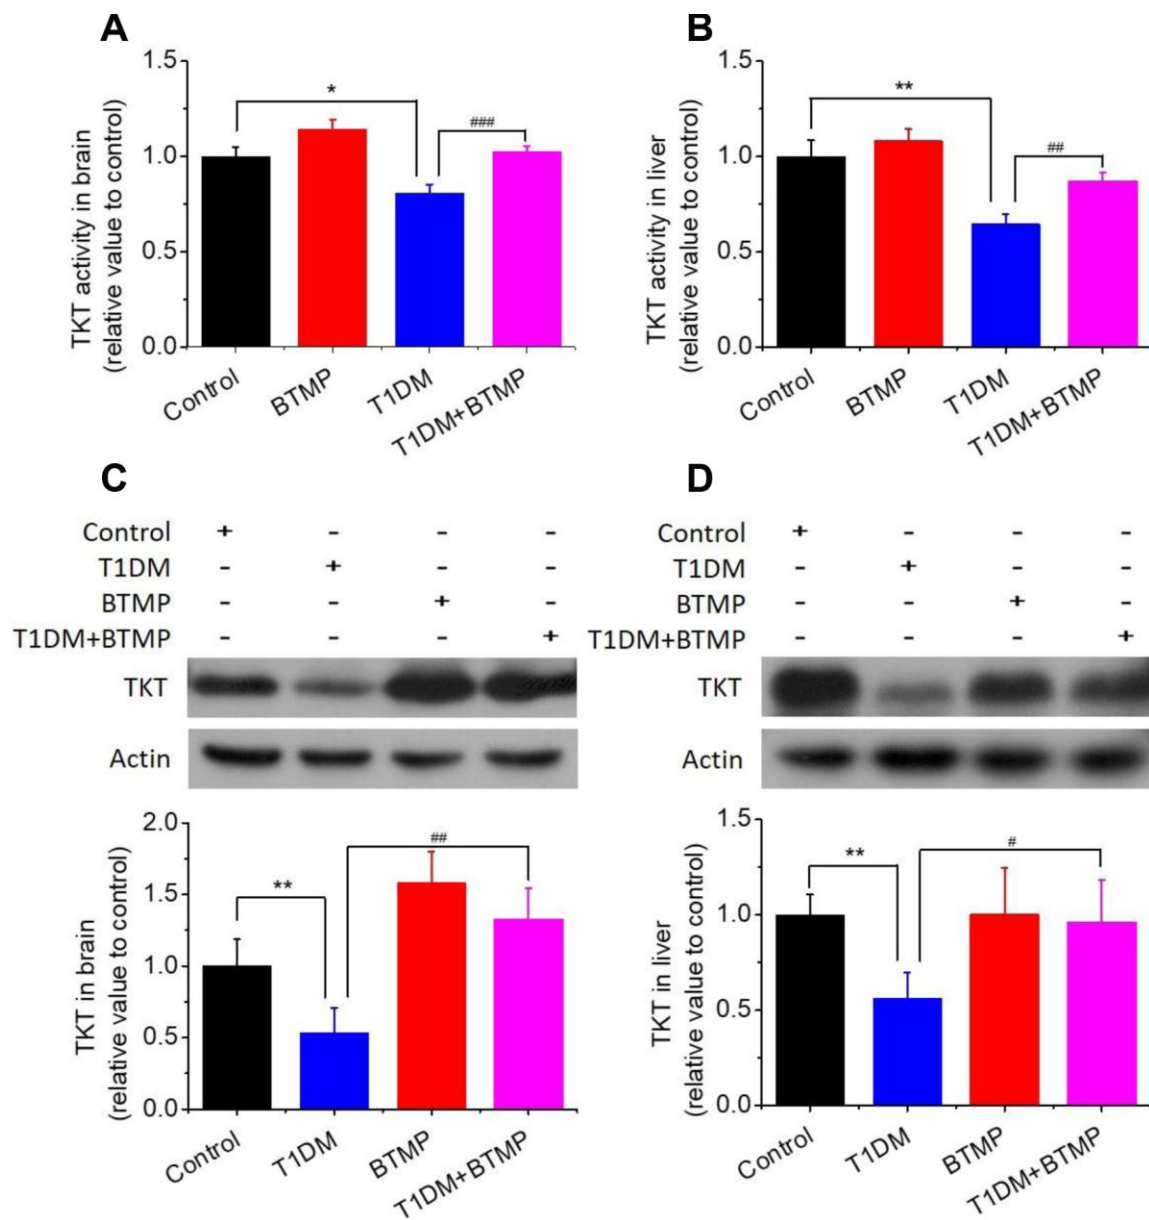

**Supplementary Figure 2. The activity and Western blotting of BTMP-gavaged T1DM rats in the brain and liver.** Conditions for the treatment were the same as those for Figure 2. The activity levels of transketolase (TKT) in the brain (panel A) and liver (panel B) were measured with ELISA kits. The numbers in the groups are control (n=10), BTMP (n=9), T1DM (n=15) and T1DM+BTMP (n=15). Western blotting of TKT using anti-TKT antibodies.  $\beta$ -Actin was used as a loading control. Quantifications were shown for the bands. The control value was set as 1.0. The number in each group is n=6. “\*” compared to the control group. “#” represents the difference between the T1DM and T1DM+BTMP groups. All values are expressed as the mean  $\pm$  S.E.M. \*,  $P < 0.05$ ; \*\*,  $P < 0.01$ ; #,  $P < 0.05$ ; ##,  $P < 0.01$ ; ###,  $P < 0.001$ .

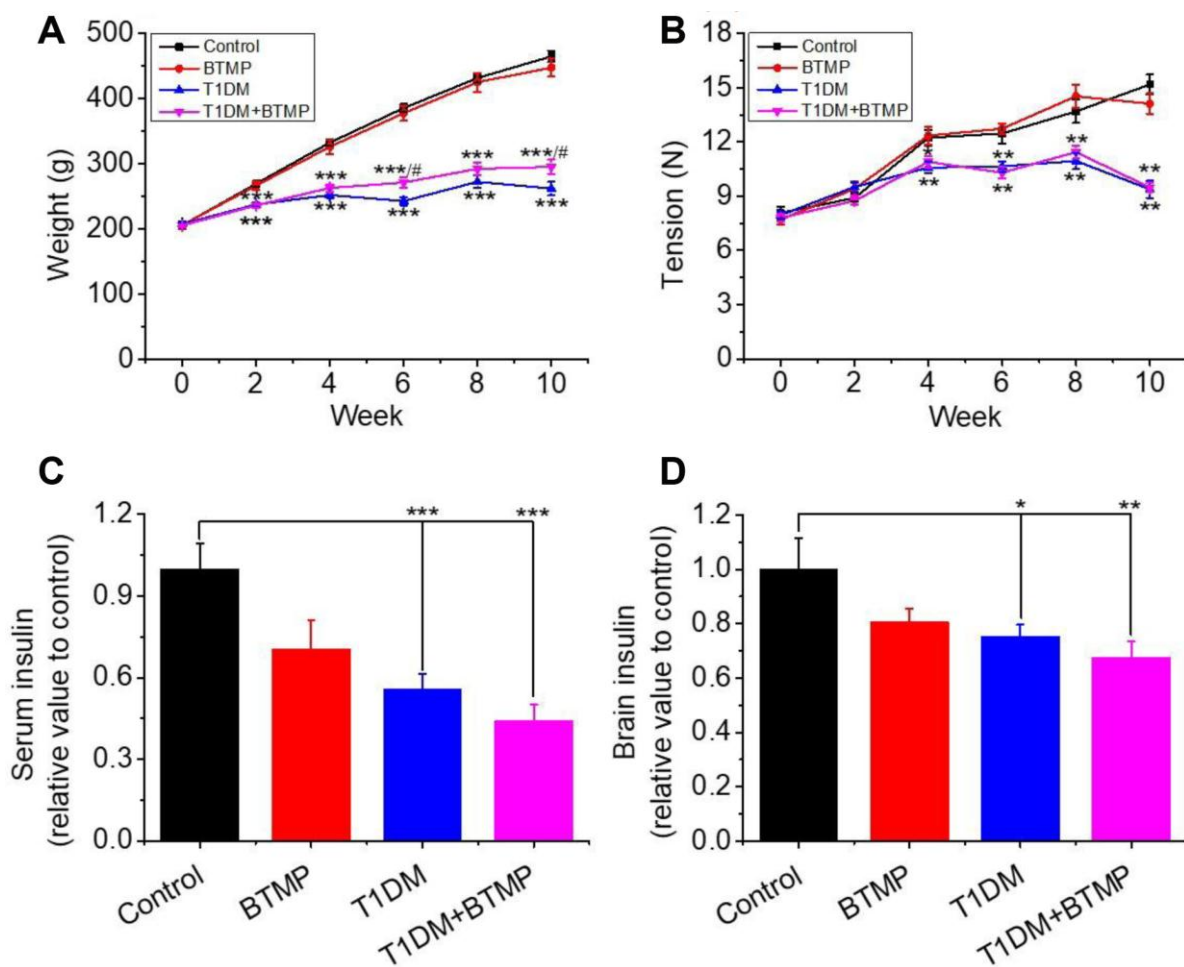

**Supplementary Figure 3. Changes in body weight, tension and insulin in BTMP-gavaged T1DM rats.** Conditions were the same as those in Figure 2. Body weights (panel A) and forepaw tension (panel B) of the four groups of rats (T1DM+benfotiamine (BTMP) (n=20), T1DM (n=20), BTMP (n=10) and Control (n=10)) were monitored every two weeks. After 10 weeks of acclimation, insulin in serum (panel C) and the brain (panel D) were determined. “\*\*\*” compared to the control group. “#” represents the difference between the T1DM and T1DM+BTMP groups. All values are expressed as the mean  $\pm$  S.E.M. \*,  $P < 0.05$ ; \*\*,  $P < 0.01$ ; \*\*\*,  $P < 0.001$ ; #,  $P < 0.05$ .

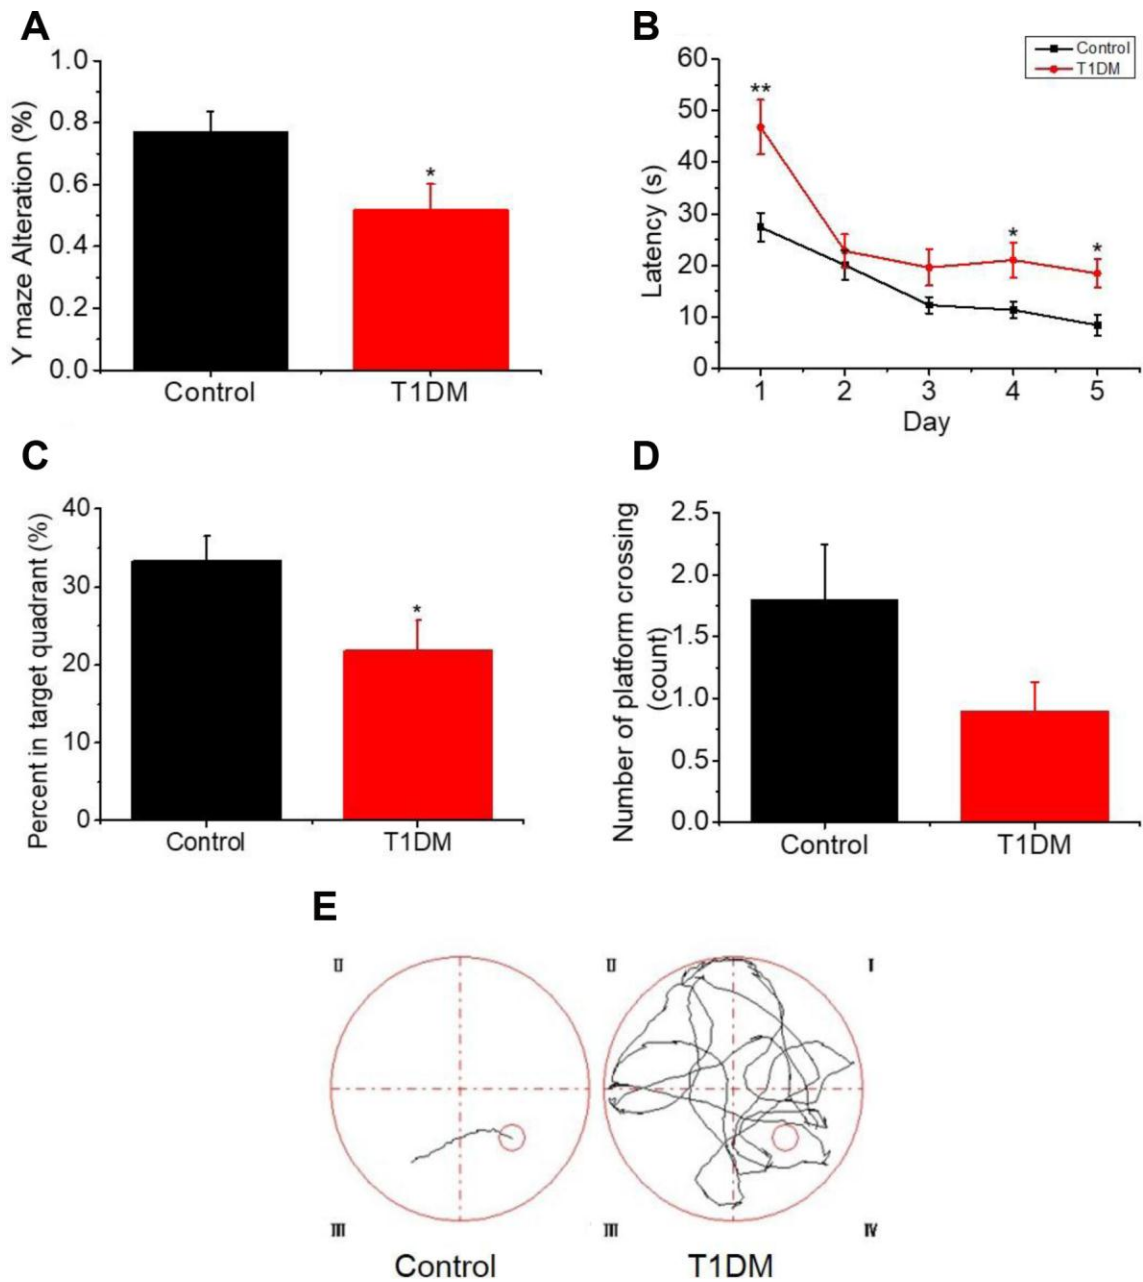

**Supplementary Figure 4. Y maze and Morris water maze tests.** Conditions for the treatment were the same as those for Supplementary Figure 1. The percentage of correct alternation in the Y maze was used to measure the exploration of a new environment (panel A). The time needed to find the hidden platform was recorded as escape latency for each of the five training days (panel B). The percentage of search time was recorded in the target quadrant from which the platform had been removed during the probe trial (panel C). The number of platform crossings in the probe trial (panel D) and the representative images of the performance path (panel E) are also shown. The numbers of those groups are control (n=10) and T1DM (n=13). All values are expressed as the mean  $\pm$  S.E.M. \*,  $P < 0.05$ ; \*\*,  $P < 0.01$ .

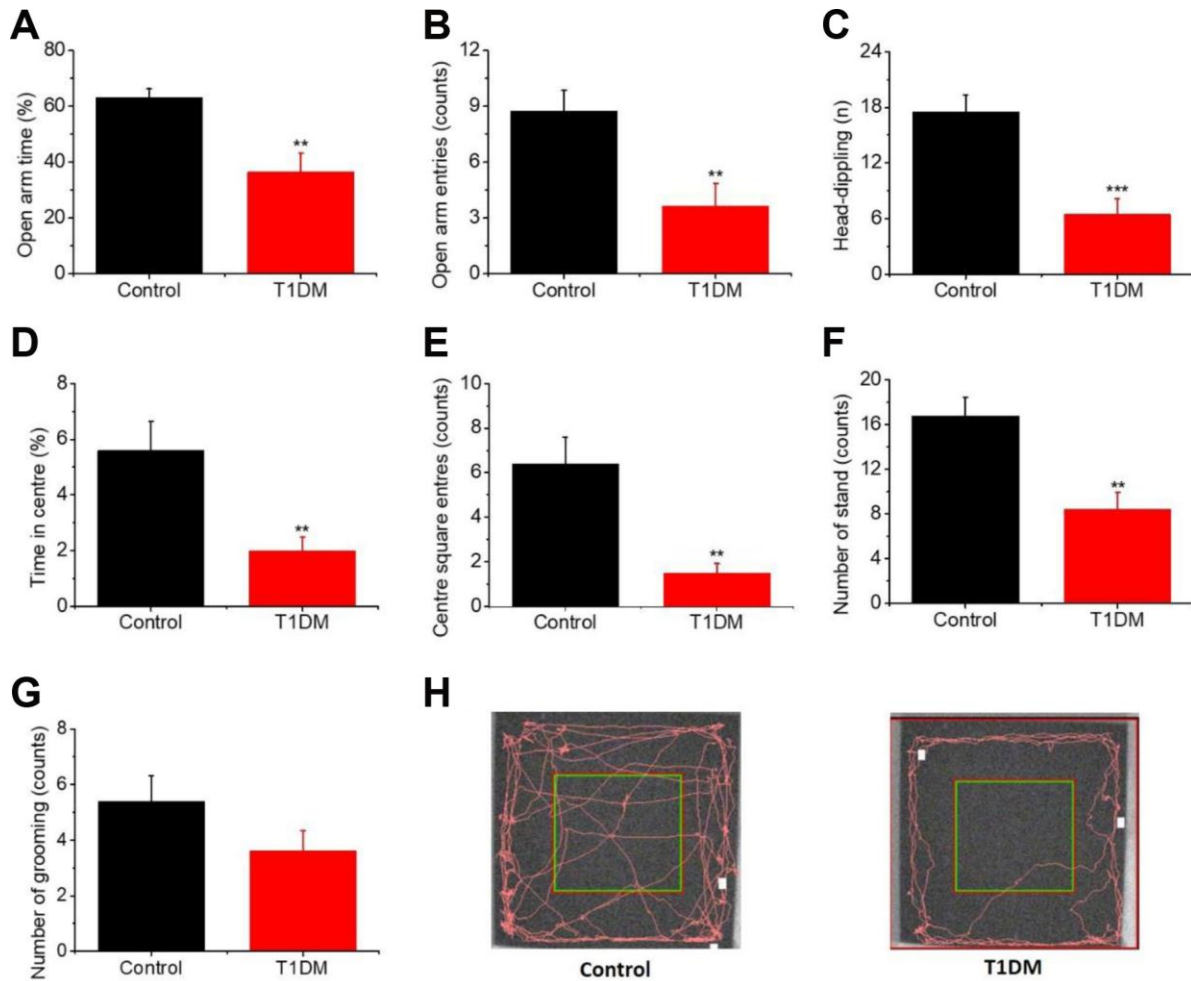

**Supplementary Figure 5. Elevated plus maze and open field test.** In the elevated plus-maze, the percentage of the time spent in the open arms (panel **A**), the number of open arm entries (panel **B**) and head-dipping (panel **C**) within 5 min was recorded. In an open field area, the percentage of time spent in the center square (panel **D**), the number of center square entries (panel **E**), number of stands (panel **F**) and number of grooming behaviors (panel **G**) are considered as an index of anxiety. Representative image of the performance path (panel **H**). “\*\*” represents the difference between Control and T1DM groups. The P values are obtained from comparative analysis of the indicated group with the controls. The numbers in the groups are control (n=10) and T1DM (n=12). All values are expressed as the mean  $\pm$  S.E.M. \*\*,  $p \leq 0.01$ ; \*\*\*,  $p \leq 0.001$ .

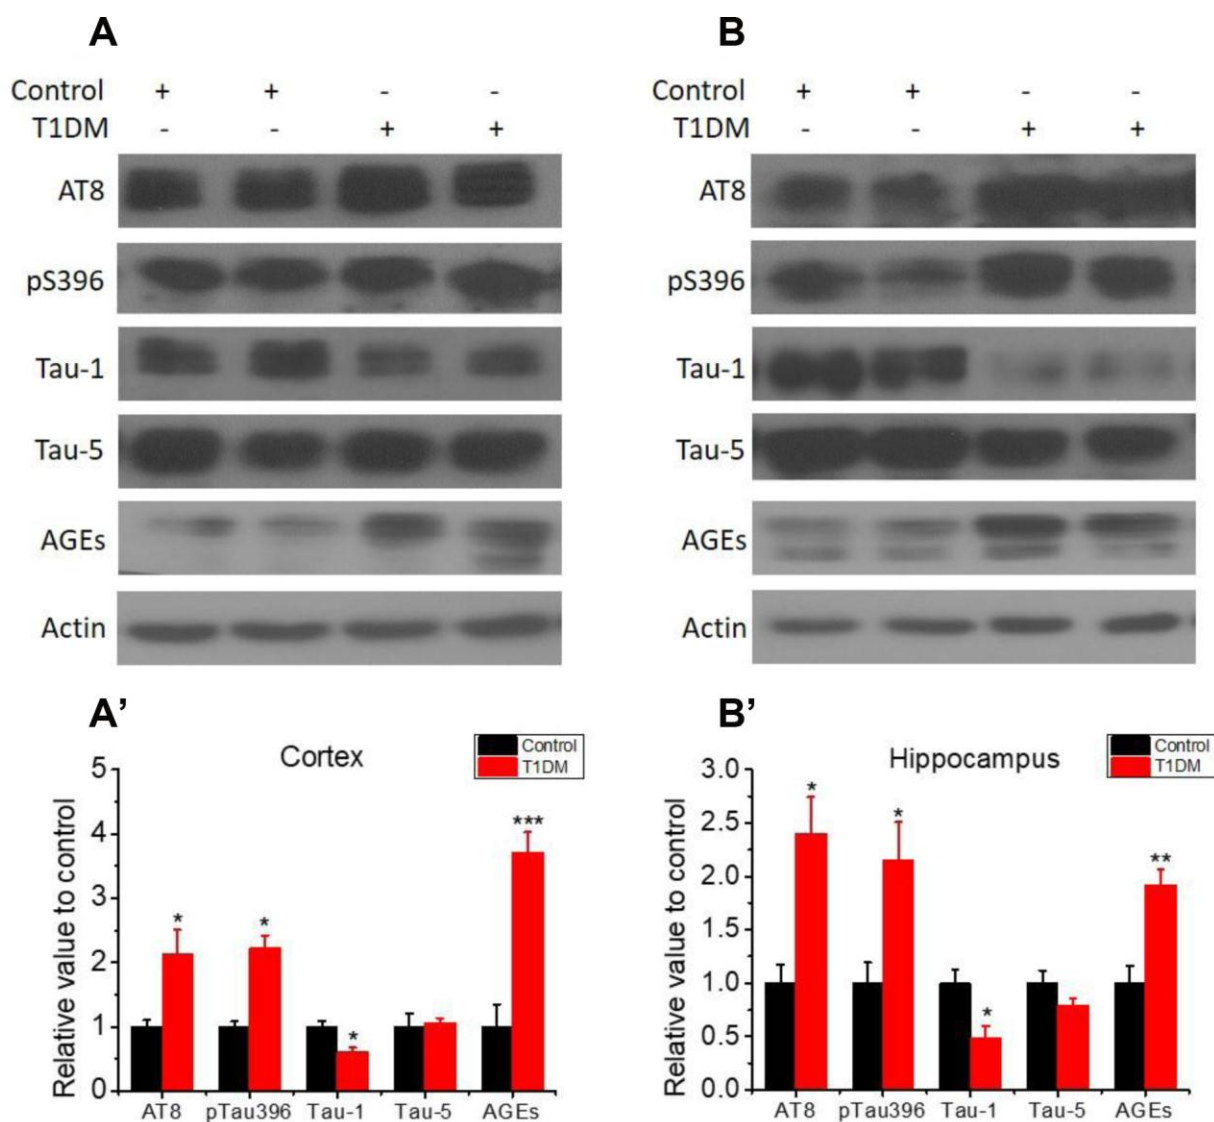

**Supplementary Figure 6. Tau phosphorylation and AGE in the cortex and hippocampus of T1DM rats.** Conditions for the treatment were the same as those for Figure 1 except phosphorylation of Tau and AGE in the cortex (panel A) and hippocampus (panel B) were detected by Western blotting using anti-pS396, anti-AT8, anti-Tau-1, anti-Tau-5 and anti-AGE antibodies.  $\beta$ -Actin was used as a loading control. Quantification is shown in panel A' and panel B'. The control value was set as 1.0. The phosphorylation levels were expressed as the ratio between phosphorylated-site and total Tau protein. The numbers in the groups are control (n=6) and T1DM (n=6). All values are expressed as the mean  $\pm$  S.E.M. \*,  $P < 0.05$ ; \*\*,  $P < 0.01$ ; \*\*\*,  $P < 0.001$ .

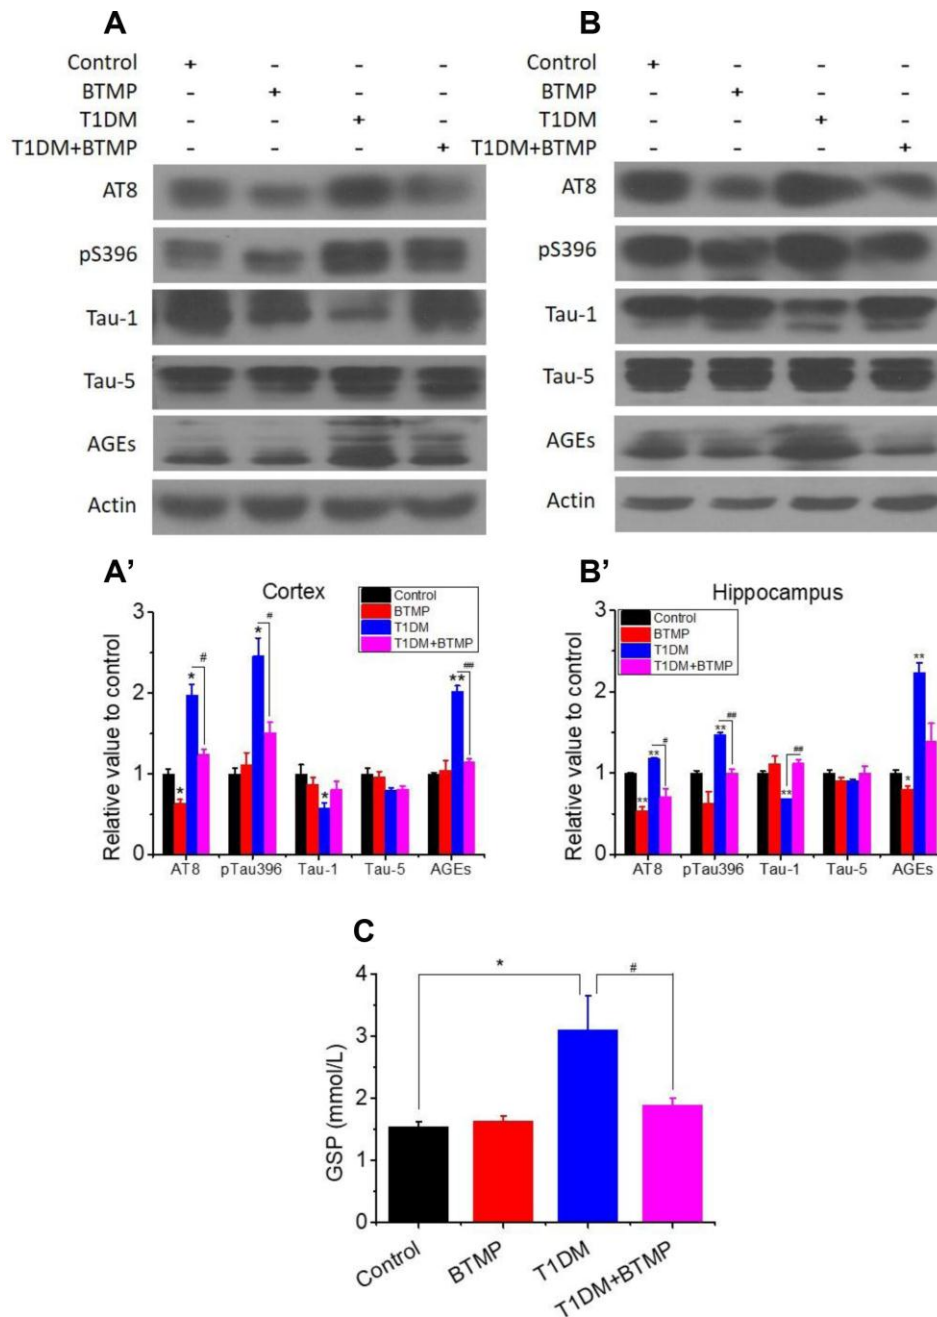

**Supplementary Figure 7. Tau phosphorylation and AGE in the cortex and hippocampus of BTMP-gavaged T1DM rats.** Conditions for the treatment were the same as those for Figure 2 except phosphorylation of Tau and AGE in the cortex (panel A) and hippocampus (panel B) were detected by Western blotting using anti-pS396, anti-AT8, anti-Tau-1 anti-Tau-5 and anti-AGE antibodies.  $\beta$ -Actin was used as a loading control. Quantifications are indicated in panel A' and panel B'. The control value was set as 1.0. The phosphorylation levels were expressed as the ratio between phosphorylated-sites and total Tau staining. The glycated serum protein level was detected using a GSP kit (panel C). "\*" compared to the control group. "#" represents the difference between the T1DM and T1DM+benfotiamine (BTMP) groups. The numbers in the groups are control (n=6), BTMP (n=6), T1DM (n=6) and T1DM+BTMP (n=6). All values are expressed as the mean  $\pm$  S.E.M. \*,  $P < 0.05$ ; \*\*,  $P < 0.01$ ; #,  $P < 0.05$ ; ##,  $P < 0.01$ .

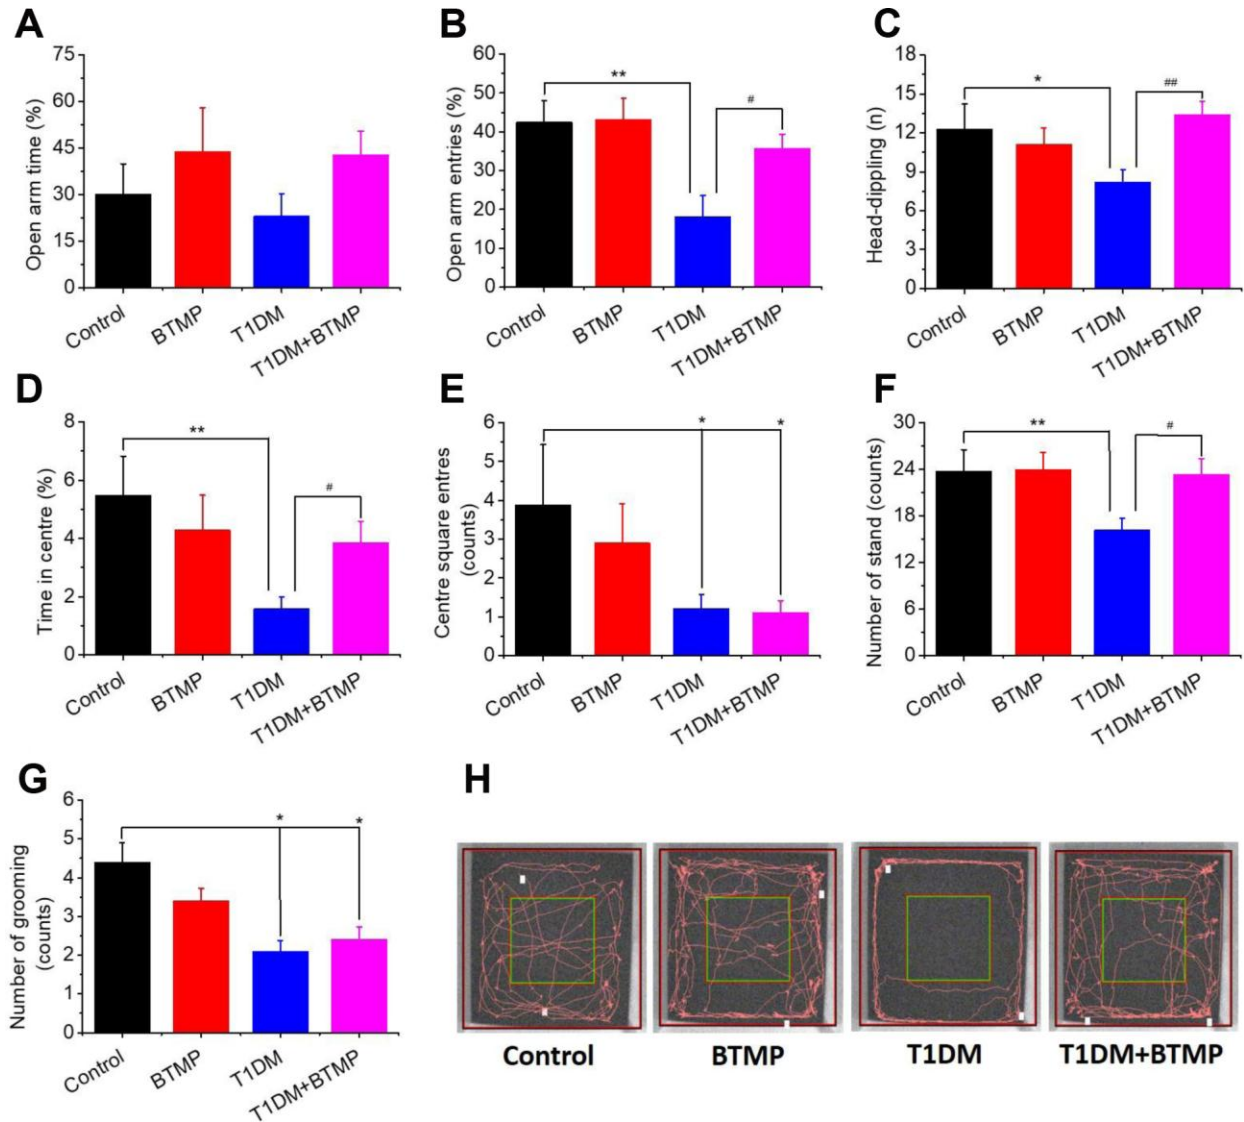

**Supplementary Figure 8. Elevated plus maze and open field test.** In the elevated plus-maze, the percentage of the time spent in the open arms (panel A), the percentage of open arm entries (panel B) and head-dipping (panel C) within 5 min was recorded. In an open field area, the percentage of time spent in the center square (panel D), the number of center square entries (panel E), number of stands (panel F) and number of grooming behaviors (panel G) are considered as an index of anxiety. Representative image of the performance path (panel H). “\*” compared to the control group. “#” represents the difference between T1DM and T1DM+BTMP group. The P values are obtained from comparative analysis of the indicated group with the controls. The numbers in those groups are control (n=10), BTMP (n=10), T1DM (n=14) and T1DM+BTMP (n=15). All values are expressed as the mean  $\pm$  S.E.M. \*,  $p \leq 0.05$ ; \*\*,  $p \leq 0.01$ , #,  $p < 0.05$ ; ##,  $p < 0.01$ .
